# Supplementary material for: An organic–inorganic hybrid UV photodetector based on a TiO2 nanobowl array with high spectrum selectivity
Source: Royal Society of Chemistry journal article supplement (doi:10.1039/c3ra44446e), 2013-01-01
Supplement: c3ra44446e.pdf [file c3ra44446e.pdf]

## Electronic Supplementary Information

### 1 XRD

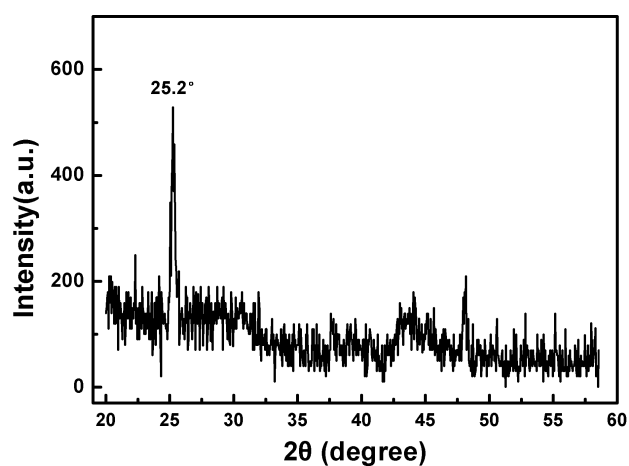

Fig. S1 XRD pattern of the TiO<sub>2</sub> NBs array.

### 2 Cross-section of AFM Data

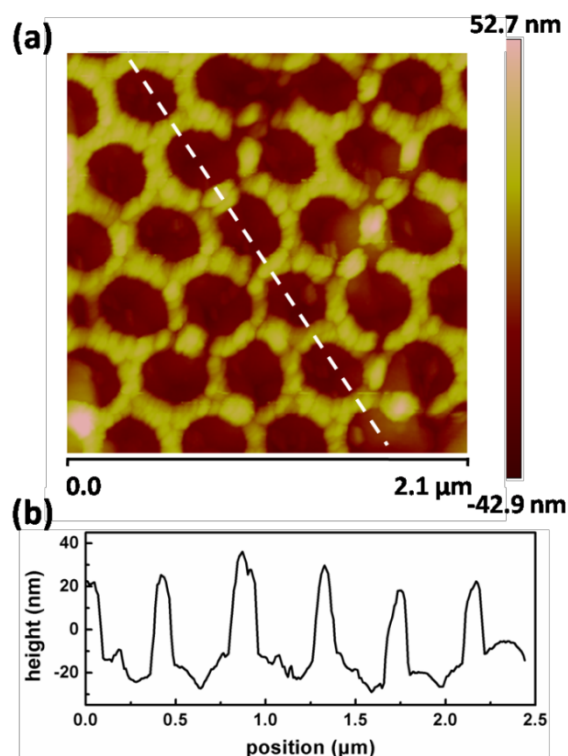

Fig. S2 (a) The 2D AFM image of TiO<sub>2</sub> NBs array, (b) the cross-section of AFM data corresponding to the position of white dot line in Fig. S2(a)

### 3 The J–V characteristics of the device in dark

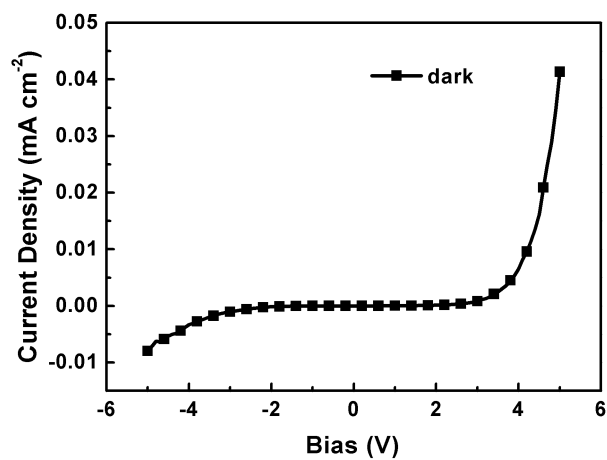

Fig. S3 The J–V characteristics of the device in dark individually (in linear scale).
